# Supplementary material for: Making remote measurement technology work in multiple sclerosis, epilepsy and depression: survey of healthcare professionals
Source: Springer Nature journal article supplement (doi:10.1186/s12911-022-01856-z), 2022-05-07
Supplement: 12911_2022_1856_MOESM1_ESM.pdf [file 12911_2022_1856_MOESM1_ESM.pdf]

# Making remote measurement technology work in multiple sclerosis, epilepsy and depression: survey of healthcare professionals. Appendix A: Survey instrument

---

## Page 1: Participant Information and Consent

RADAR-CNS ([www.radar-cns.org](http://www.radar-cns.org)) is investigating the use of remote measuring technologies (RMT) in provision of health and social care. We are specifically investigating their use in the care of people with one or more of the following conditions

- epilepsy
- multiple sclerosis (MS)
- depression

We are examining how commercially available lifestyle devices, like FitBits, can be used to monitor and predict changes in a range of clinically relevant factors e.g. in activity, mobility, mood, seizure frequency. The information collected by the devices could be useful for patients and their healthcare team and may help find ways of improving treatment.

This survey investigates healthcare professional views and experiences of RMT and mHealth more generally. This will contribute to our understanding of how these technologies impact clinical pathways and decision points from the perspective of the healthcare professionals.

If you are a healthcare professional providing care for people living with epilepsy/ MS/depression, we would like to have your thoughts about these devices.

We would be grateful if you would complete this questionnaire. We are just looking for your opinions, we are not asking you to take part in any trials.

The survey should take approx 10min of your time.

As a thank you for your time, we will donate £1 to a relevant charity for every complete questionnaire we receive. At the end of the questionnaire you will be provided with the choice of three charities to donate to.

Thank you very much for your help!

1. Do you agree with the following statements?

|                                                                                                                                                                      | Consent process       |                       |
|----------------------------------------------------------------------------------------------------------------------------------------------------------------------|-----------------------|-----------------------|
|                                                                                                                                                                      | Yes                   | No                    |
| I understand that all information from this survey will be reported anonymously.                                                                                     | <input type="radio"/> | <input type="radio"/> |
| I understand that my data will only be accessed by the research team and will be used cumulatively in any publications and reports.                                  | <input type="radio"/> | <input type="radio"/> |
| I understand that the survey data will be stored securely in accordance with the University of Nottingham data storage policy (as per the Data Protection Act 1998). | <input type="radio"/> | <input type="radio"/> |
| I understand that I can withdraw from this survey at any point.                                                                                                      | <input type="radio"/> | <input type="radio"/> |
| I am aged 18 years or over.                                                                                                                                          | <input type="radio"/> | <input type="radio"/> |

2. I consent to my participation in this survey and the use of my data in RADAR-CNS outputs. \* Required

- Yes
- No

## Page 2: Healthcare Professional role

3. How old are you?

- 18 -30 years
- 31 - 40years
- 41 - 50 years
- 51- 60 years
- Over 60 years

4. What is your specialism? (please tick all that apply)

- Neurology
- Mood Disorders
- Mental Health
- Epilepsy
- Multiple Sclerosis
- Depression
- General Practice
- Psychology
- Social Care
- Other

4.a. If you selected Other, please specify:

5. What is the title of your job role? (Please indicate if you have any specialisation e.g. paediatrics, geriatrics etc)

6. What kind of clinical setting do you work in? (If you work in multiple settings please select the one in which you provide most care and spend the most time) \* *Required*

- Primary Care/ General Practice
- Secondary Care - hospital trust, inpatients
- Secondary Care - hospital trust, outpatients
- Secondary Care- mental health trust, inpatients
- Secondary Care- mental health trust, outpatients
- Specialist Tertiary care centre
- Community Care
- Other

7. What country do you work in?

## Page 3: Current use of digital services and devices in your role as a Health Care Professional (HCP)

8. Are there any apps that you currently use on a daily basis in your clinical practice?

- Guidelines apps
- Calculation apps
- Prescribing/ dosing apps
- Communication apps
- Other

8.a. If you selected Other, please specify:

9. Have you experienced your patients using any of these devices for improving or increasing awareness of their health?

|                                     | Device                   |                          |                          | If you selected Other, please specify:                                  |
|-------------------------------------|--------------------------|--------------------------|--------------------------|-------------------------------------------------------------------------|
|                                     | Smartphone apps          | Wearable sensing device  | Other                    |                                                                         |
| Weight Management                   | <input type="checkbox"/> | <input type="checkbox"/> | <input type="checkbox"/> | <div style="border: 1px solid black; height: 25px; width: 100%;"></div> |
| Sleep Monitoring                    | <input type="checkbox"/> | <input type="checkbox"/> | <input type="checkbox"/> | <div style="border: 1px solid black; height: 25px; width: 100%;"></div> |
| Activity Monitoring                 | <input type="checkbox"/> | <input type="checkbox"/> | <input type="checkbox"/> | <div style="border: 1px solid black; height: 25px; width: 100%;"></div> |
| Monitoring for a specific condition | <input type="checkbox"/> | <input type="checkbox"/> | <input type="checkbox"/> | <div style="border: 1px solid black; height: 25px; width: 100%;"></div> |

|                               |                          |                          |                          |                      |
|-------------------------------|--------------------------|--------------------------|--------------------------|----------------------|
| Monitoring Mood               | <input type="checkbox"/> | <input type="checkbox"/> | <input type="checkbox"/> | <input type="text"/> |
| Setting personal health goals | <input type="checkbox"/> | <input type="checkbox"/> | <input type="checkbox"/> | <input type="text"/> |
| Other                         | <input type="checkbox"/> | <input type="checkbox"/> | <input type="checkbox"/> | <input type="text"/> |

10. If the data from these technologies gets used in your consultation, please indicate if the data impacts the following factors.

|                                                                  | Does the data impact the following.... |                       |                       |                       |                       |
|------------------------------------------------------------------|----------------------------------------|-----------------------|-----------------------|-----------------------|-----------------------|
|                                                                  | Definitely                             | Sometimes             | Unsure                | Hardly                | Never                 |
| Communication between yourself and patients                      | <input type="radio"/>                  | <input type="radio"/> | <input type="radio"/> | <input type="radio"/> | <input type="radio"/> |
| Your understanding of patient health state at consultation       | <input type="radio"/>                  | <input type="radio"/> | <input type="radio"/> | <input type="radio"/> | <input type="radio"/> |
| Your understanding of patient health state between consultations | <input type="radio"/>                  | <input type="radio"/> | <input type="radio"/> | <input type="radio"/> | <input type="radio"/> |
| Patients awareness of their own health                           | <input type="radio"/>                  | <input type="radio"/> | <input type="radio"/> | <input type="radio"/> | <input type="radio"/> |
| Your decision making processes during consultation               | <input type="radio"/>                  | <input type="radio"/> | <input type="radio"/> | <input type="radio"/> | <input type="radio"/> |

## Page 4: Your thoughts about using digital devices for long term monitoring of medical conditions

11. Which of the following data sets do you think would be useful to be monitored over a period of time? Please answer the column that best describes the area you work in.

|                                              | Epilepsy              |                       | Multiple Sclerosis    |                       | Depression            |                       |
|----------------------------------------------|-----------------------|-----------------------|-----------------------|-----------------------|-----------------------|-----------------------|
|                                              | Yes                   | No                    | Yes                   | No                    | Yes                   | No                    |
| Body movements                               | <input type="radio"/> | <input type="radio"/> | <input type="radio"/> | <input type="radio"/> | <input type="radio"/> | <input type="radio"/> |
| Continuous tracking of location using GPS    | <input type="radio"/> | <input type="radio"/> | <input type="radio"/> | <input type="radio"/> | <input type="radio"/> | <input type="radio"/> |
| Heart Rate                                   | <input type="radio"/> | <input type="radio"/> | <input type="radio"/> | <input type="radio"/> | <input type="radio"/> | <input type="radio"/> |
| Breathing Rate                               | <input type="radio"/> | <input type="radio"/> | <input type="radio"/> | <input type="radio"/> | <input type="radio"/> | <input type="radio"/> |
| Smartphone usage                             | <input type="radio"/> | <input type="radio"/> | <input type="radio"/> | <input type="radio"/> | <input type="radio"/> | <input type="radio"/> |
| Voice Quality                                | <input type="radio"/> | <input type="radio"/> | <input type="radio"/> | <input type="radio"/> | <input type="radio"/> | <input type="radio"/> |
| Sweating                                     | <input type="radio"/> | <input type="radio"/> | <input type="radio"/> | <input type="radio"/> | <input type="radio"/> | <input type="radio"/> |
| Skin Temperature                             | <input type="radio"/> | <input type="radio"/> | <input type="radio"/> | <input type="radio"/> | <input type="radio"/> | <input type="radio"/> |
| Environment features e.g. light, temperature | <input type="radio"/> | <input type="radio"/> | <input type="radio"/> | <input type="radio"/> | <input type="radio"/> | <input type="radio"/> |
| Sleep Quality                                | <input type="radio"/> | <input type="radio"/> | <input type="radio"/> | <input type="radio"/> | <input type="radio"/> | <input type="radio"/> |

11.a. In your experience and opinion is there any other information/ data sets that you think could be useful to track?

12. Do you think it could be useful to collect information on mood, concentration, attention and memory as supplementary data in addition to physiological monitoring?

| Is this data useful? |        |    |
|----------------------|--------|----|
| Yes                  | Unsure | No |

|               |                       |                       |                       |
|---------------|-----------------------|-----------------------|-----------------------|
| Mood          | <input type="radio"/> | <input type="radio"/> | <input type="radio"/> |
| Concentration | <input type="radio"/> | <input type="radio"/> | <input type="radio"/> |
| Attention     | <input type="radio"/> | <input type="radio"/> | <input type="radio"/> |
| Memory        | <input type="radio"/> | <input type="radio"/> | <input type="radio"/> |

13. How often do you think it would be useful for the patient to respond to mood based questions?

- Daily
- Weekly
- Monthly
- Never
- Retrospective responses following medical event e.g. seizure, relapse etc
- Other

13.a. If you selected Other, please specify:



## Page 5: Value of RMT

14. Who in your organisation/ clinical teams do you think would make most use of the data from RMT enabled devices? e.g. would it be yourself, nursing or medical staff, primary/ secondary care providers?

15. Do you think your healthcare organisation would benefit from the use of these technologies as part of patients care plans?

- Highly likely to benefit
- Likely to benefit
- Unsure
- Unlikely to benefit
- Highly unlikely to benefit

15.a. If there is benefit to be experienced, who (outside of the patient) is likely to benefit most from the data which is recorded from RMT?

16. Are there any specific decision points in your clinical practices/ provision of care where you feel information from monitoring technologies might be useful?

[+ More info](#)

|                                                                  | Yes                      | Maybe                    | No                       |
|------------------------------------------------------------------|--------------------------|--------------------------|--------------------------|
| Decision points that rely on specific relapse/ seizure measures? | <input type="checkbox"/> | <input type="checkbox"/> | <input type="checkbox"/> |

|                                                                                             |                          |                          |                          |
|---------------------------------------------------------------------------------------------|--------------------------|--------------------------|--------------------------|
| Decision points that rely on other physiological measures that are non specific to relapse? | <input type="checkbox"/> | <input type="checkbox"/> | <input type="checkbox"/> |
| Decision points that rely on mood based variables?                                          | <input type="checkbox"/> | <input type="checkbox"/> | <input type="checkbox"/> |
| Decision points that rely on contextual factors?                                            | <input type="checkbox"/> | <input type="checkbox"/> | <input type="checkbox"/> |

## Page 6: Accessing and using the data

17. How likely are you to access data from the RMT in the following situations?

|                                                                                                  | Access frequency      |                       |                       |                       |                       |                       |
|--------------------------------------------------------------------------------------------------|-----------------------|-----------------------|-----------------------|-----------------------|-----------------------|-----------------------|
|                                                                                                  | Highly likely         | Likely                | Maybe                 | Unlikely              | Highly unlikely       | Never                 |
| In preparation for a consultation with a patient                                                 | <input type="radio"/> | <input type="radio"/> | <input type="radio"/> | <input type="radio"/> | <input type="radio"/> | <input type="radio"/> |
| During a consultation with a patient                                                             | <input type="radio"/> | <input type="radio"/> | <input type="radio"/> | <input type="radio"/> | <input type="radio"/> | <input type="radio"/> |
| In between consultations with a patient if the system were to flag up data/ reasons for concern? | <input type="radio"/> | <input type="radio"/> | <input type="radio"/> | <input type="radio"/> | <input type="radio"/> | <input type="radio"/> |
| Post medical event e.g. seizure and/ or relapse                                                  | <input type="radio"/> | <input type="radio"/> | <input type="radio"/> | <input type="radio"/> | <input type="radio"/> | <input type="radio"/> |

17.a. Are there any other times when you think having access to this kind of data might be useful? Please explain.

18. How would you prefer to gain access to the information? Please rank 1-4 with 1 being the most preferable option and 4 being the least preferable.

Please don't select more than 1 answer(s) per row.

|                                                                                                 | 1                        | 2                        | 3                        | 4                        |
|-------------------------------------------------------------------------------------------------|--------------------------|--------------------------|--------------------------|--------------------------|
| Information made available during consultation via the patients device (smartphone, tablet etc) | <input type="checkbox"/> | <input type="checkbox"/> | <input type="checkbox"/> | <input type="checkbox"/> |

|                                                                                                                           |                          |                          |                          |                          |
|---------------------------------------------------------------------------------------------------------------------------|--------------------------|--------------------------|--------------------------|--------------------------|
| Information made available to you automatically, at any time via a secure portal.                                         | <input type="checkbox"/> | <input type="checkbox"/> | <input type="checkbox"/> | <input type="checkbox"/> |
| Information made available to you remotely, at the patients discretion.                                                   | <input type="checkbox"/> | <input type="checkbox"/> | <input type="checkbox"/> | <input type="checkbox"/> |
| Information made available via notification if the system detects a downturn in patient healthstate or potential relapse. | <input type="checkbox"/> | <input type="checkbox"/> | <input type="checkbox"/> | <input type="checkbox"/> |

**19.** For you as a healthcare provider please rank the following statements in order of what aspect of RMT may provide benefit to you in your clinical practice. 1 indicates most benefit and 5 indicates least benefit.

Please don't select more than 1 answer(s) per row.

|                                                                                                            | 1                        | 2                        | 3                        | 4                        | 5                        |
|------------------------------------------------------------------------------------------------------------|--------------------------|--------------------------|--------------------------|--------------------------|--------------------------|
| Information about patient healthstate over a long period of time                                           | <input type="checkbox"/> | <input type="checkbox"/> | <input type="checkbox"/> | <input type="checkbox"/> | <input type="checkbox"/> |
| Information about patient healthstate before or in the run up to a medical 'event' e.g. seizure or relapse | <input type="checkbox"/> | <input type="checkbox"/> | <input type="checkbox"/> | <input type="checkbox"/> | <input type="checkbox"/> |
| Information about patient healthstate during a medical 'event' e.g. seizure or relapse                     | <input type="checkbox"/> | <input type="checkbox"/> | <input type="checkbox"/> | <input type="checkbox"/> | <input type="checkbox"/> |
| Information about specific physiological measures over a long period of time                               | <input type="checkbox"/> | <input type="checkbox"/> | <input type="checkbox"/> | <input type="checkbox"/> | <input type="checkbox"/> |

|                                                                           |                          |                          |                          |                          |                          |
|---------------------------------------------------------------------------|--------------------------|--------------------------|--------------------------|--------------------------|--------------------------|
| Information about mental health/ mood measures over a long period of time | <input type="checkbox"/> | <input type="checkbox"/> | <input type="checkbox"/> | <input type="checkbox"/> | <input type="checkbox"/> |
|---------------------------------------------------------------------------|--------------------------|--------------------------|--------------------------|--------------------------|--------------------------|

19.a. Are there any other benefits that you might like to suggest?

20. For you as a healthcare provider, how do you perceive the potential challenges associated with RMT use? Please rank the following questions in order of concern, where 1 indicates you are most concerned and 5 indicates you are least concerned.

Please don't select more than 1 answer(s) per row.

|                                                                 | 1                        | 2                        | 3                        | 4                        | 5                        |
|-----------------------------------------------------------------|--------------------------|--------------------------|--------------------------|--------------------------|--------------------------|
| Additional workload for yourself                                | <input type="checkbox"/> | <input type="checkbox"/> | <input type="checkbox"/> | <input type="checkbox"/> | <input type="checkbox"/> |
| Burden of having too much information                           | <input type="checkbox"/> | <input type="checkbox"/> | <input type="checkbox"/> | <input type="checkbox"/> | <input type="checkbox"/> |
| Time to review information                                      | <input type="checkbox"/> | <input type="checkbox"/> | <input type="checkbox"/> | <input type="checkbox"/> | <input type="checkbox"/> |
| Adherence of patients to using the technology                   | <input type="checkbox"/> | <input type="checkbox"/> | <input type="checkbox"/> | <input type="checkbox"/> | <input type="checkbox"/> |
| Patient anxiety related to health monitoring and access to data | <input type="checkbox"/> | <input type="checkbox"/> | <input type="checkbox"/> | <input type="checkbox"/> | <input type="checkbox"/> |

20.a. Are there any other challenges you might like to suggest?

21. If a patient were to use this technology in monitoring their health condition, how do you think this would impact on your job? Please respond to each of the individual following statements with one answer

|                                                                                          | How much do you agree with each of these statements? |                       |                       |                       |                       |
|------------------------------------------------------------------------------------------|------------------------------------------------------|-----------------------|-----------------------|-----------------------|-----------------------|
|                                                                                          | Strongly Agree                                       | Agree                 | Neutral               | Disagree              | Strongly Disagree     |
| RMTs will help in my management of patients                                              | <input type="radio"/>                                | <input type="radio"/> | <input type="radio"/> | <input type="radio"/> | <input type="radio"/> |
| You can have too much information about patients health state                            | <input type="radio"/>                                | <input type="radio"/> | <input type="radio"/> | <input type="radio"/> | <input type="radio"/> |
| I think that these technologies provide more value to patients than clinicians           | <input type="radio"/>                                | <input type="radio"/> | <input type="radio"/> | <input type="radio"/> | <input type="radio"/> |
| I like to engage with novel technologies in my work                                      | <input type="radio"/>                                | <input type="radio"/> | <input type="radio"/> | <input type="radio"/> | <input type="radio"/> |
| I think technology is a good tool for helping patients manage their condition themselves | <input type="radio"/>                                | <input type="radio"/> | <input type="radio"/> | <input type="radio"/> | <input type="radio"/> |
| RMT could fit well into my clinical practice                                             | <input type="radio"/>                                | <input type="radio"/> | <input type="radio"/> | <input type="radio"/> | <input type="radio"/> |
| RMT could over complicate the healthcare system                                          | <input type="radio"/>                                | <input type="radio"/> | <input type="radio"/> | <input type="radio"/> | <input type="radio"/> |
| If RMT was proven to detect relapse, it then has the potential to 'free up' resources    | <input type="radio"/>                                | <input type="radio"/> | <input type="radio"/> | <input type="radio"/> | <input type="radio"/> |

## Page 7: Technical Support Requirements

22. How much technical support do you think you would need to be able to make use of the data being collected by the device? Please select one.

- None, I would work it out for myself
- A one off training session
- Optional daily support
- Optional weekly support
- Ad hoc support

23. Please rank your preference regarding mode of training/ technical support.

Please don't select more than 1 answer(s) per row.

|                                           | 1                        | 2                        | 3                        | 4                        | 5                        | 6                        |
|-------------------------------------------|--------------------------|--------------------------|--------------------------|--------------------------|--------------------------|--------------------------|
| Person to person                          | <input type="checkbox"/> | <input type="checkbox"/> | <input type="checkbox"/> | <input type="checkbox"/> | <input type="checkbox"/> | <input type="checkbox"/> |
| Document based instructions for use (IFU) | <input type="checkbox"/> | <input type="checkbox"/> | <input type="checkbox"/> | <input type="checkbox"/> | <input type="checkbox"/> | <input type="checkbox"/> |
| Online based instructions for use (IFU)   | <input type="checkbox"/> | <input type="checkbox"/> | <input type="checkbox"/> | <input type="checkbox"/> | <input type="checkbox"/> | <input type="checkbox"/> |
| Online videos                             | <input type="checkbox"/> | <input type="checkbox"/> | <input type="checkbox"/> | <input type="checkbox"/> | <input type="checkbox"/> | <input type="checkbox"/> |
| Online help 'chat' support                | <input type="checkbox"/> | <input type="checkbox"/> | <input type="checkbox"/> | <input type="checkbox"/> | <input type="checkbox"/> | <input type="checkbox"/> |
| Telephone or video conference support     | <input type="checkbox"/> | <input type="checkbox"/> | <input type="checkbox"/> | <input type="checkbox"/> | <input type="checkbox"/> | <input type="checkbox"/> |

24. How much technical support do you think your patients would need in order to use these devices and data?

- None, they could work it out

- A one off training session
- Optional daily support
- Optional weekly support
- Ad hoc support



## Page 8: Closing remarks

25. Do you have any thoughts or comments about the use of RMT, mHealth or patient worn devices that you think are important/ useful to this study? If so please write them below.

26. Please select which charity you would like to receive the donation for your participation. Please select one.

- Multiple Sclerosis Society
- Epilepsy Action
- Mind (Mental Health Charity)

27. If you would like to hear more about this research project and/or get involved in related studies as we progress then please write your email in the box below.

27.a. I am interested in....

- Hearing more about this project. Sign me up to the e-newsletter
- I would like to consider contributing to this project further. Please keep me up to date about relevant studies.

## Page 9: Thank you

Thank you very much for your valuable contribution to this research project.

Your time spent on this will help us work towards understanding how these novel technologies might fit into clinical practice and what value they will provide to patients and healthcare professionals.

Kind Regards

RADAR-CNS Team

---
